# Supplementary material
Source: HighWire-hosted journal article supplement (https://heart.bmj.com/content/109/19/1450)
Supplement: inline-supplementary-material-3 [file inline-supplementary-material-3.pdf]

## S3. Variable importance test in logistic regression analyses on outcome angina pectoris.

Model if variable removed.

| Variable                          | Change in -2 Log likelihood | Sig. of the change |
|-----------------------------------|-----------------------------|--------------------|
| <b>Model 1</b>                    |                             |                    |
| Born in Sweden                    | 170.873                     | <0.000             |
| Economic status                   | 75.749                      | <0.000             |
| Self-perceived depression         | 37.781                      | <0.000             |
| Self-perceived stress             | 62.605                      | <0.000             |
| Education                         | 49.566                      | <0.000             |
| Employment                        | 43.531                      | <0.000             |
| Age                               | 11.275                      | 0.004              |
| Sex                               | 1.187                       | 0.276              |
| Civil status                      | 3.122                       | 0.210              |
| <b>Model 2</b>                    |                             |                    |
| Born in Sweden                    | 119.138                     | <0.000             |
| Physical activity                 | 93.368                      | <0.000             |
| Economic status                   | 54.932                      | <0.000             |
| Self-perceived stress             | 50.132                      | <0.000             |
| Employment                        | 37.634                      | <0.000             |
| Self-perceived depression         | 33.778                      | <0.000             |
| Alcohol consumption               | 29.506                      | <0.000             |
| Education                         | 26.558                      | <0.000             |
| Age                               | 7.939                       | 0.019              |
| Smoking                           | 2.838                       | 0.242              |
| Civil status                      | 1.536                       | 0.464              |
| Sex                               | .113                        | 0.737              |
| <b>Model 3</b>                    |                             |                    |
| Born in Sweden                    | 105.480                     | <0.000             |
| Physical activity                 | 52.170                      | <0.000             |
| Economic status                   | 45.978                      | <0.000             |
| Self-perceived stress             | 38.844                      | <0.000             |
| Self-perceived depression         | 32.334                      | <0.000             |
| BMI                               | 24.478                      | <0.000             |
| Employment                        | 20.329                      | <0.000             |
| Previous revascularization        | 18.623                      | <0.000             |
| Alcohol consumption               | 18.132                      | <0.000             |
| Atrial fibrillation/flutter       | 15.788                      | <0.000             |
| Treated hypertension              | 9.935                       | 0.002              |
| Heart failure                     | 9.587                       | 0.002              |
| Education                         | 11.933                      | 0.003              |
| OSAS                              | 8.901                       | 0.003              |
| Previous myocardial infarction    | 7.832                       | 0.005              |
| Sex                               | 7.824                       | 0.005              |
| Hs-CRP                            | 9.515                       | 0.009              |
| COPD                              | 5.487                       | 0.019              |
| eGFR                              | 6.275                       | 0.043              |
| HbA1c                             | 5.135                       | 0.077              |
| HDL                               | 4.143                       | 0.126              |
| Treated hyperlipidemia            | 1.895                       | 0.169              |
| Previous stroke                   | 1.393                       | 0.238              |
| Treated diabetes mellitus         | .420                        | 0.517              |
| Civil status                      | .898                        | 0.638              |
| DBP                               | .865                        | 0.649              |
| Treated peripheral artery disease | .036                        | 0.849              |
| Smoking                           | .254                        | 0.881              |
| Age                               | .159                        | 0.924              |
